# Supplementary material for: Molecular testing stratifies the risk of structural recurrence in high risk differentiated thyroid cancer: a retrospective cohort study
Source: Front Endocrinol (Lausanne). 2025 Jan 24;16:1508404. doi: 10.3389/fendo.2025.1508404 (PMC11802368; doi:10.3389/fendo.2025.1508404)
Supplement: Supplementary file 1 [file Table1.xlsx]

## Sheet: Supporting 1
pat_ID	AGE_Y	SEX	TumorSize_cm	Multifocal	T_stage	ETE	ENE	N_stage	M_stage	Matestasis	Local_disease	TNM_stage	PRI_resection	total_or_lobe	Node_dissection	Dead_alive	Therapeutic_RAI	T_to_Recur_month	Survival_month	DoF_month	Pathology	Alteration_1	Alteration_2	Alteration_3
1	52	female	5.5	Y	3B	Macro	Y	1b	0	Metachronous	Recurrent	1	R0	TT	LND	Alive	Refractory	54		49	PTC	BRAF V600E	TERT C228T	NA
2	78	male	3.2	Y	3B	Macro	N	1a	0	Metachronous	Recurrent	2	R0	TT	CND	Alive	Avid	7		49	PTC	BRAF V600E	TERT C228T	NA
3	67	male	6.5	N	3B	Macro	N	1a	0	Metachronous	Cured	2	R0	TT	CND	Alive	Avid	9		46	WIFTC	NRAS Q61R	PIK3CA H1047R	TERT C228T
4	36	female	2.5	Y	3B	Macro	Y	1b	1	Synchronous	Cured	2	R0	TT	LND	Alive	Refractory			44	PTC	TERT C228T	NA	NA
5	66	female	2.8	N	4A	Macro	N	1a	1	Synchronous	Cured	3	R0	TT	CND	Alive	Refractory			39	PTC	BRAF V600E	TERT C228T	NA
6	29	female	3.8	Y	3B	Macro	N	1a	0	None	Recurrent	1	R0	TT	CND	Alive		12		47	Agressive	TERT C228T	NA	NA
7	33	male	2	Y	4A	Macro	Y	1b	0	None	Cured	1	R0	TT	LND	Alive				47	PTC	BRAF V600E	NA	NA
8	38	female	4	Y	4A	Macro	N	1b	0	None	Persistent	1	R2	TT	LND	Alive	Avid			45	PTC	BRAF V600E	NA	NA
9	57	male	2.6	Y	2	Micro	Y	1b	0	Metachronous	Cured	2	R0	TT	LND	Alive	Refractory	13		45	Agressive	BRAF V600E	TERT C228T	NA
10	55	male	1.5	N	3B	Macro	Y	1a	0	None	Cured	2	R0	TT	CND	Alive				45	PTC	BRAF V600E	TERT C228T	NA
11	66	female	4.2	Y	4B	Macro	Y	1b	1	Synchronous	Cured	4B	R1	TT	LND	Alive	Refractory			45	Agressive	BRAF V600E	TERT C250T	NA
12	62	male	5.5	Y	4A	Macro	N	1b	1	Synchronous	Recurrent	4B	R1	TT	LND	Alive	Refractory			30	Agressive	ETV6/NTRK3	NA	NA
13	55	female	2.5	N	4A	Macro	N	0	0	None	Cured	3	R1	TT	CND	Alive				43	PTC	BRAF V600E	NA	NA
14	41	male	1	Y	3B	Macro	N	1a	0	None	Cured	1	R0	TT	CND	Alive				45	PTC	BRAF V600E	NA	NA
15	66	male	2	N	4A	Macro	N	1b	0	Metachronous	Cured	3	R0	TT	LND	Alive	Refractory	9		44	Agressive	TERT C228T	NA	NA
16	32	male	1.5	Y	4A	Macro	Y	1b	0	None	Cured	1	R0	TT	LND	Alive				44	PTC	BRAF V600E	NA	NA
17	45	female	1.5	N	3B	Macro	N	1b	0	None	Recurrent	1	R0	TT	LND	Alive		20		43	PTC	CCDC6/RET	NA	NA
18	63	male	4.3	N	4A	Macro	N	1b	1	Synchronous	Persistent	4B	R2	TT	LND	Dead			7	7	PTC	BRAF V600E	PIK3CA E545K	NA
19	33	female	2.2	Y	2	Micro	Y	1a	0	None	Cured	2	R0	LT	CND	Alive				43	PTC	CCDC6/RET	NA	NA
20	45	female	0.5	N	4A	Macro	N	1a	0	None	Cured	1	R0	TT	CND	Alive				43	PTC	BRAF V600E	NA	NA
21	51	male	2	Y	4A	Macro	Y	1b	0	Metachronous	Recurrent	1	R1	TT	LND	Alive	Avid	27		42	PTC	BRAF V600E	TERT C228T	NA
22	40	male	0.4	N	3B	Macro	N	1a	0	None	Cured	1	R0	TT	CND	Alive				41	PTC	BRAF V600E	NA	NA
23	61	male	3.5	Y	4A	Macro	Y	1b	0	None	Recurrent	3	R1	TT	LND	Alive		33		38	Agressive	BRAF V600E	TERT C228T	NA
24	26	female	2	Y	4A	Macro	Y	1b	0	None	Cured	1	R0	TT	LND	Alive				39	PTC	BRAF V600E	NA	NA
25	53	male	1.5	Y	4A	Macro	N	1a	0	None	Cured	1	R0	TT	CND	Alive				39	PTC	BRAF V600E	NA	NA
26	43	male	5	Y	4A	Macro	Y	1b	1	Synchronous	Cured	2	R0	TT	LND	Alive	Refractory			32	Agressive	TERT C228T	NA	NA
27	58	female	0.8	Y	3B	Macro	N	1a	0	None	Cured	1	R0	TT	CND	Alive				39	PTC	BRAF V600E	NA	NA
28	56	male	6	Y	4A	Macro	Y	1b	0	None	Recurrent	3	R0	TT	LND	Alive		26		39	Agressive	BRAF V600E	NA	NA
29	23	male	2.5	Y	4A	Macro	N	1b	0	None	Cured	1	R0	TT	LND	Alive				38	PTC	BRAF V600E	NA	NA
30	49	male	7	Y	4A	Macro	N	1a	1	Synchronous	Cured	2	R1	TT	CND	Alive	Refractory			38	PTC	BRAF V600E	TERT C228T	NA
31	34	male	1.5	Y	3B	Macro	Y	1a	0	None	Cured	1	R0	TT	CND	Alive				38	PTC	BRAF V600E	NA	NA
32	34	male	2.2	Y	4A	Macro	Y	1b	0	None	Cured	1	R0	TT	LND	Alive				38	PTC	BRAF V600E	NA	NA
33	58	female	4	N	3B	Macro	N	1a	0	None	Cured	2	R0	TT	CND	Alive				37	PTC	BRAF V600E	TERT C228T	NA
34	14	male	1.4	Y	3B	Macro	Y	1b	0	None	Cured	1	R0	TT	LND	Alive				37	PTC	NCOA4/RET	NA	NA
35	28	male	4	N	4A	Macro	N	1a	0	None	Cured	1	R1	TT	CND	Alive				37	PTC	BRAF V600E	NA	NA
36	47	female	4.5	Y	4A	Macro	N	1a	0	None	Cured	1	R1	TT	CND	Alive				36	PTC	BRAF V600E	NA	NA
37	16	female	2.5	Y	4A	Macro	N	1b	0	Metachronous	Cured	2	R0	TT	LND	Alive	Avid	4		36	PTC	CCDC6/RET	NA	NA
38	49	female	4	Y	3B	Macro	N	1a	0	None	Cured	1	R0	TT	CND	Alive				36	PTC	ERC1/RET	NA	NA
39	49	female	4.5	N	3B	Macro	N	1a	0	None	Cured	1	R0	TT	CND	Alive				35	PTC	BRAF V600E	NA	NA
40	51	male	1.2	Y	4A	Macro	N	1a	0	None	Cured	1	R1	TT	CND	Alive				36	PTC	BRAF V600E	NA	NA
41	51	female	4	Y	4A	Macro	Y	1b	0	Metachronous	Recurrent	1	R1	TT	LND	Dead	Refractory	6	15	15	Agressive	BRAF V600E	PIK3CA H1047R	NA
42	51	female	1	Y	4A	Macro	N	0	0	None	Cured	1	R0	TT	CND	Alive				34	PTC	BRAF V600E	NA	NA
43	51	female	1.5	Y	3B	Macro	N	0	0	None	Cured	1	R0	TT	CND	Alive				33	PTC	BRAF V600E	NA	NA
44	42	female	1	Y	4A	Macro	Y	1b	0	None	Cured	1	R0	TT	LND	Alive				34	PTC	BRAF V600E	NA	NA
45	37	female	2.7	N	3B	Macro	N	1b	0	None	Cured	1	R0	TT	LND	Alive				35	PTC	BRAF V600E	NA	NA
46	49	female	2	N	4A	Macro	N	1a	0	None	Cured	1	R0	TT	CND	Alive				34	PTC	BRAF V600E	NA	NA
47	48	female	1.5	Y	4A	Macro	N	1b	0	None	Cured	1	R1	TT	LND	Alive				34	PTC	BRAF V600E	NA	NA
48	50	female	1.8	N	3B	Macro	N	1a	0	None	Cured	1	R0	TT	CND	Alive				33	PTC	BRAF V600E	NA	NA
49	56	female	2.3	Y	3B	Macro	N	1b	0	None	Cured	2	R0	TT	LND	Alive				33	PTC	BRAF V600E	NA	NA
50	72	male	6	Y	3A	Micro	Y	1a	0	Metachronous	Cured	4B	R0	TT	CND	Alive	Refractory	9		33	WIFTC	TERT C228T	NA	NA
51	28	female	2.5	N	3B	Macro	N	1a	0	None	Cured	1	R0	TT	CND	Alive				33	PTC	BRAF V600E	NA	NA
52	31	female	0.8	Y	4A	Macro	N	1a	0	None	Cured	1	R0	TT	CND	Alive				33	PTC	BRAF V600E	NA	NA
53	44	female	1.3	N	3B	Macro	N	1a	0	None	Cured	1	R0	TT	CND	Alive				33	PTC	BRAF V600E	NA	NA
54	48	female	4	Y	3B	Macro	Y	1b	0	None	Recurrent	1	R0	TT	LND	Alive		19		33	PTC	CCDC6/RET	NA	NA
55	60	female	0.8	Y	3B	Macro	N	1a	0	None	Cured	1	R0	TT	CND	Alive				33	PTC	TP53 E271K	NA	NA
56	43	female	2	Y	4A	Macro	N	1b	0	None	Cured	1	R1	TT	LND	Alive				33	PTC	BRAF V600E	NA	NA
57	32	male	2	Y	4A	Macro	Y	1b	0	None	Cured	1	R0	TT	LND	Alive				33	PTC	BRAF V600E	NA	NA
58	68	male	2.2	Y	4A	Macro	Y	1b	0	None	Cured	3	R0	TT	LND	Alive				33	PTC	BRAF V600E	NA	NA
59	72	female	1.5	Y	3B	Macro	Y	1b	0	None	Cured	2	R0	TT	LND	Alive				27	PTC	BRAF V600E	NA	NA
60	39	male	1	Y	1B	Micro	Y	1a	0	None	Cured	1	R0	LT	CND	Alive				32	PTC	BRAF V600E	PIK3CA G1049R	NA
61	56	female	4	Y	3B	Macro	Y	1b	1	Synchronous	Cured	2	R0	TT	LND	Alive	Refractory			32	PTC	KRAS Q61K	NA	NA
62	52	female	2.5	N	4B	Macro	Y	1b	1	Synchronous	Persistent	2	R2	TT	LND	Alive				32	Agressive	BRAF V600E	NA	NA
63	53	male	3	Y	3B	Macro	Y	1b	0	None	Recurrent	1	R0	TT	LND	Alive	Refractory	23		32	Agressive	BRAF V600E	TERT C228T	NA
64	67	female	2.2	N	4B	Macro	Y	1b	1	Synchronous	Persistent	3	R2	TT	LND	Alive				32	PTC	BRAF V600E	TERT C228T	NA
65	51	female	0.8	Y	3B	Macro	N	0	0	None	Cured	1	R0	TT	CND	Alive				32	PTC	BRAF V600E	NA	NA
66	30	male	0.9	Y	4A	Macro	Y	1a	0	None	Cured	1	R0	TT	CND	Alive				32	PTC	BRAF V600E	NA	NA
67	46	female	3	Y	4A	Macro	Y	1b	0	None	Cured	1	R1	TT	LND	Alive				31	PTC	BRAF V600E	NA	NA
68	29	female	3	N	4A	Macro	N	1b	0	None	Cured	1	R1	TT	LND	Alive				31	PTC	NCOA4/RET	NA	NA
69	56	female	2.7	Y	4A	Macro	N	1a	1	Synchronous	Cured	4B	R1	TT	CND	Alive	Refractory			32	Agressive	BRAF V600E	TERT C228T	NA
70	53	male	3.5	Y	4A	Macro	Y	1a	0	None	Cured	1	R1	TT	CND	Alive				31	PTC	BRAF V600E	TERT C228T	NA
71	68	male	2	N	3B	Macro	N	1b	0	None	Cured	1	R0	TT	LND	Alive				31	Agressive	TERT C228T	NA	NA
72	62	female	1.5	N	3B	Macro	N	1a	0	None	Cured	2	R0	TT	CND	Alive				31	PTC	BRAF V600E	NA	NA
73	43	female	0.8	N	4A	Macro	N	1a	0	None	Cured	1	R1	TT	CND	Alive				31	PTC	BRAF V600E	NA	NA
74	32	female	1.1	Y	4A	Macro	N	1b	0	None	Recurrent	1	R1	TT	LND	Alive		9		32	PTC	ETV6/NTRK3	NA	NA
75	56	male	2.2	Y	3B	Macro	Y	1b	0	Metachronous	Recurrent	4B	R0	TT	LND	Alive	Avid	6		31	PTC	NCOA4/RET	NA	NA
76	56	male	4.5	N	4A	Macro	Y	1b	0	None	Recurrent	3	R1	TT	LND	Alive		7		31	PTC	BRAF V600E	PIK3CA M1043V	NA
77	39	male	1.2	Y	4A	Macro	N	1b	0	None	Cured	1	R0	TT	LND	Alive				31	PTC	BRAF V600E	NA	NA
78	51	female	0.5	N	1A	None	N	0	1	Synchronous	Cured	2	R0	TT	CND	Dead	Refractory		22	22	PTC	NRAS Q61K	TERT C228T	NA
79	42	male	2	N	3B	Macro	N	1b	0	None	Cured	1	R0	TT	LND	Alive				30	PTC	CCDC6/RET	NA	NA
80	31	male	1.3	Y	3B	Macro	N	1b	0	None	Recurrent	1	R0	TT	LND	Alive		5		30	Agressive	BRAF V600E	NA	NA
81	68	male	5	N	3A	None	Y	1b	1	Synchronous	Persistent	4B	R2	TT	LND	Alive	Avid			29	WIFTC	TERT C228T	NA	NA
82	64	male	1.2	Y	4A	Macro	N	1b	0	None	Recurrent	3	R0	TT	LND	Alive		11		30	PTC	BRAF V600E	TERT C228T	NA
83	54	female	5	N	4A	Macro	Y	1b	0	None	Cured	1	R0	TT	LND	Alive				29	PTC	BRAF V600E	NA	NA
84	44	male	3.5	Y	4A	Macro	Y	1b	0	None	Cured	1	R0	TT	LND	Alive				29	PTC	BRAF V600E	NA	NA
85	29	female	0.7	Y	4A	Macro	N	0	0	None	Cured	1	R0	TT	CND	Alive				28	PTC	CCDC6/RET	NA	NA
86	84	female	5.8	Y	4A	Macro	N	1b	1	Synchronous	Persistent	4B	R2	TT	LND	Alive				28	PTC	BRAF V600E	TERT C250T	NA
87	56	female	1.7	Y	3B	Macro	Y	1b	0	None	Cured	2	R0	TT	LND	Alive				27	PTC	BRAF V600E	NA	NA
88	80	female	4.3	Y	4A	Macro	Y	1b	1	Synchronous	Cured	4B	R0	TT	LND	Alive	Avid			27	Agressive	KRAS Q61R	NA	NA
89	35	female	3.5	Y	3B	Macro	Y	1b	1	Synchronous	Cured	2	R0	TT	LND	Alive	Refractory			27	Agressive	CCDC6/RET	NA	NA
90	34	male	5	N	3B	Macro	N	1a	0	None	Cured	1	R0	TT	CND	Alive				26	PTC	BRAF V600E	NA	NA
91	47	male	1	N	3B	Macro	N	1a	0	None	Cured	1	R0	TT	CND	Alive				25	PTC	BRAF V600E	NA	NA
92	31	male	5	N	3B	Macro	Y	1b	0	None	Cured	1	R0	TT	LND	Alive				25	PTC	BRAF V600E	NA	NA
93	67	female	1.4	N	3B	Macro	N	1a	0	None	Cured	2	R0	TT	CND	Alive				24	PTC	BRAF V600E	NA	NA
94	59	male	0.8	Y	3B	Macro	Y	1a	0	None	Cured	2	R0	TT	CND	Alive				26	Agressive	BRAF V600E	TERT C228T	NA
95	33	female	1.2	N	3B	Macro	N	1a	0	None	Cured	1	R0	TT	CND	Alive				26	PTC	BRAF V600E	NA	NA
96	37	male	1.3	N	4A	Macro	N	1a	0	None	Cured	1	R0	TT	CND	Alive				26	PTC	BRAF V600E	NA	NA
97	29	male	1.2	Y	1B	Micro	Y	1a	0	None	Cured	1	R0	LT	CND	Alive				26	PTC	BRAF V600E	NA	NA
98	51	male	0.7	N	4A	Macro	N	0	0	None	Cured	1	R0	TT	CND	Alive				26	PTC	BRAF V600E	NRAS Q61R	NA
99	62	male	4.2	Y	4A	Macro	Y	1a	0	None	Cured	3	R1	TT	CND	Alive				25	PTC	BRAF V600E	NA	NA
100	40	female	2	Y	4A	Macro	N	1b	1	Synchronous	Cured	2	R0	TT	LND	Alive	Avid			25	PTC	CCDC6/RET	NA	NA
101	48	female	1.3	N	3B	Macro	N	1a	0	None	Cured	1	R0	TT	CND	Alive				25	PTC	BRAF V600E	NA	NA
102	50	female	2	Y	4A	Macro	N	1b	0	None	Cured	1	R0	TT	LND	Alive				24	PTC	BRAF V600E	PIK3CA H1047R	NA
103	45	female	4	Y	4A	Macro	Y	1b	0	None	Cured	1	R0	TT	LND	Alive				25	PTC	BRAF V600E	NA	NA
104	35	male	2.2	N	4A	Macro	N	1a	0	None	Cured	1	R0	TT	CND	Alive				25	PTC	BRAF V600E	NA	NA
105	19	female	1.8	Y	4A	Macro	Y	1b	0	None	Cured	1	R0	TT	LND	Alive				24	PTC	BRAF V600E	NA	NA
106	12	female	2.5	Y	4A	Macro	Y	1b	0	None	Cured	1	R0	TT	LND	Alive				24	PTC	NCOA4/RET	NA	NA
107	35	female	1.8	Y	4A	Macro	Y	1b	0	None	Cured	1	R0	TT	LND	Alive				24	PTC	BRAF V600E	NA	NA
108	33	male	1.3	N	4A	Macro	Y	1b	0	None	Cured	1	R0	TT	LND	Alive				24	PTC	BRAF V600E	NA	NA
